# Supplementary material for: Mesoporous Ag@TiO2 nanofibers and their photocatalytic activity for hydrogen evolution
Source: Royal Society of Chemistry journal article supplement (doi:10.1039/c7ra03177g), 2017-01-01
Supplement: c7ra03177g1.pdf [file c7ra03177g1.pdf]

## *Electronic Supplementary Information*

### **Mesoporous Ag@TiO<sub>2</sub> Nanofibers and Their Photocatalytic Activity for Hydrogen Evolution**

*Minghui Shang, Huilin Hou\*, Fengmei Gao, Lin Wang and Weiyu Yang\**

Institute of Materials, Ningbo University of Technology, Ningbo City, 315016, P.R. China

***Corresponding author E-mails: houhuilin86@163.com (H. Hou)***

***weiyuyang@tsinghua.org.cn (W. Yang)***

***Tel: +86-574-87080966***

***Fax: +86-574-87081221***

**Table S1.** Crystal size of the TiO<sub>2</sub> according to the XRD results of the three sample products

| <b>Samples</b>     | <b>Crystallite<br/>(101)</b> | <b>Crystallite<br/>(004)</b> | <b>Crystallite<br/>(200)</b> | <b>Average crystal<br/>size (nm)</b> |
|--------------------|------------------------------|------------------------------|------------------------------|--------------------------------------|
| Unloaded Sample    | 21.1                         | 26.9                         | 22.2                         | 23.4                                 |
| Ag loaded sample A | 19.1                         | 24.2                         | 18.3                         | 20.5                                 |
| Ag loaded sample B | 20.6                         | 25.8                         | 21.8                         | 22.7                                 |

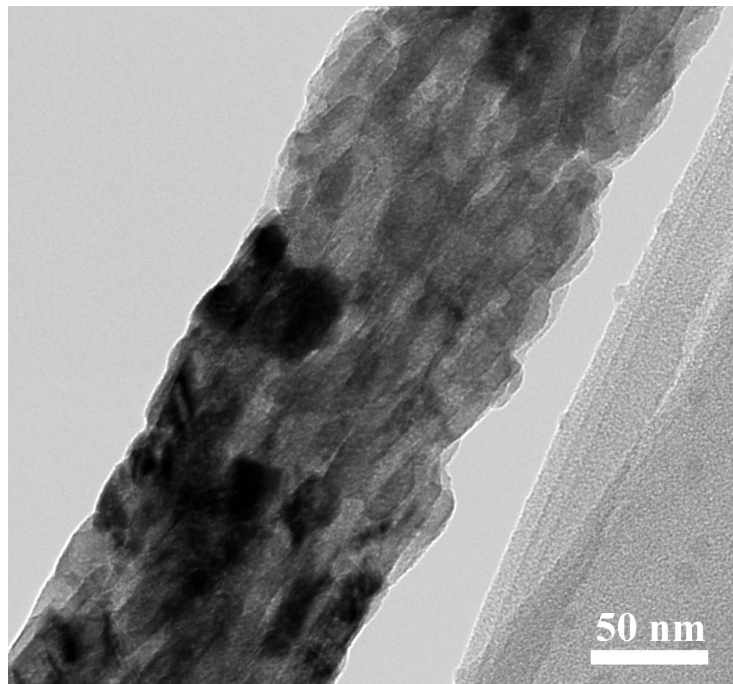

**Fig. S1.** A typical TEM image of the pure TiO<sub>2</sub> Sample

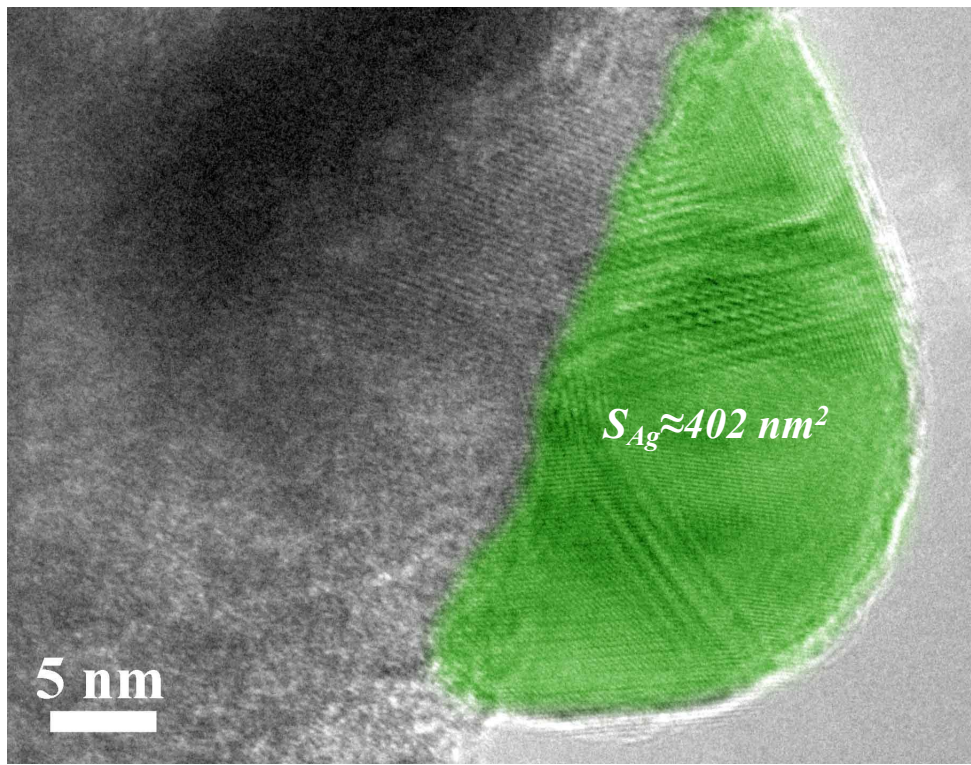

**Fig. S2.** A typical HTRM image showing that the assembled Ag nanoparticle in the platform of porous  $\text{TiO}_2$  fibers of Sample A is hemispheric shape and the areas is  $402 \text{ nm}^2$ . The green marked areas refer to the crystalline Ag nanoparticles.

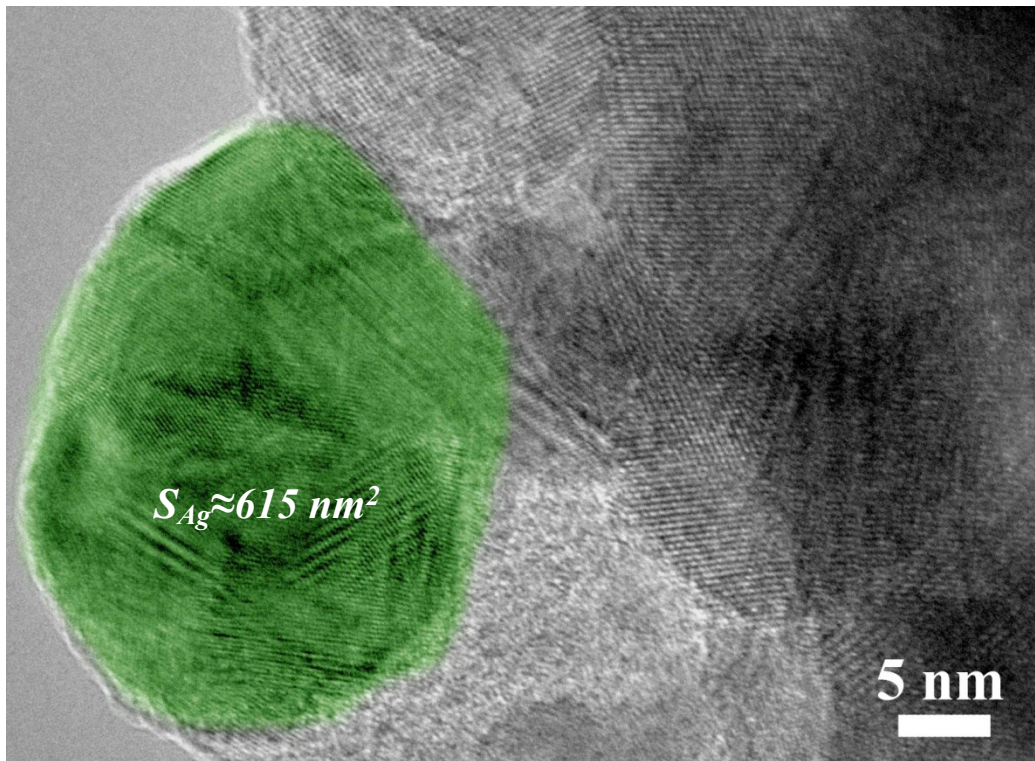

**Fig. S3.** A typical HTRM image showing that the assembled Ag nanoparticle in the platform of porous TiO<sub>2</sub> fibers of Sample B is spheroid shape and the areas is 615nm<sup>2</sup>. The green marked areas refer to the crystalline Ag nanoparticles.

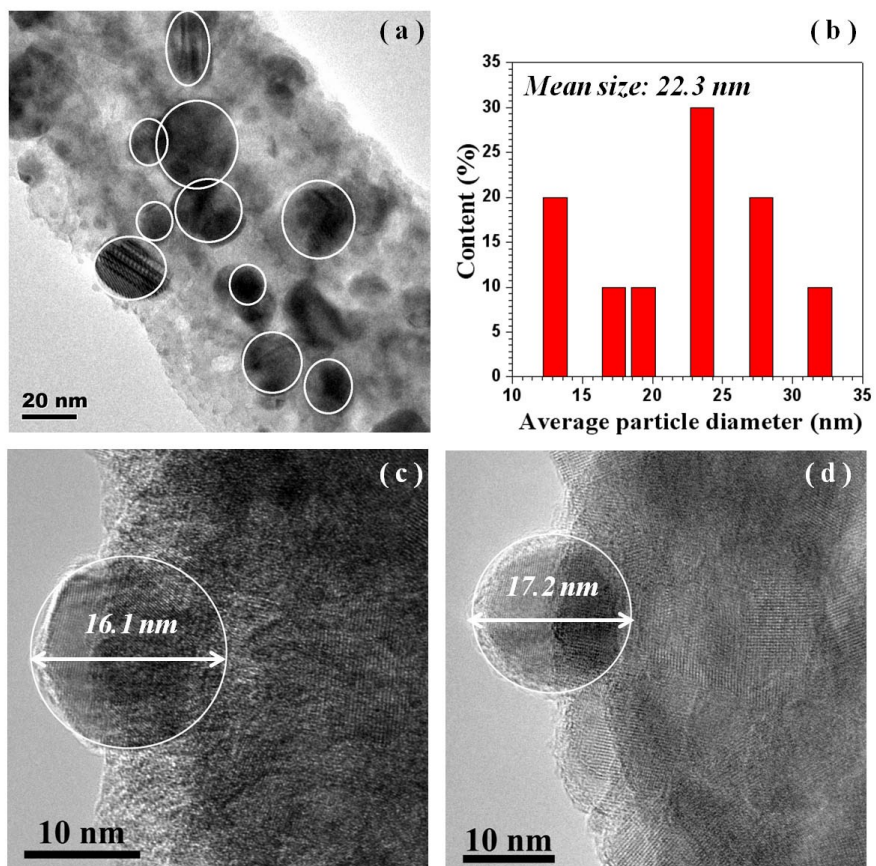

**Fig. S4.** (a) A representative TEM image of the Ag loaded Sample B. (b) The corresponding particle size distribution of the silver NPs from (a) of Ag loaded Sample B. (c-d) Representative TEM images of the Ag loaded Sample A.

**Table S2.** Comparison of the related work for photocatalytic H<sub>2</sub> production

| Material                                    | Preparation                      | Irradiation conditions | Reaction solution         | Activity ( $\mu\text{mol g}^{-1}\text{h}^{-1}$ ) | Reference    |
|---------------------------------------------|----------------------------------|------------------------|---------------------------|--------------------------------------------------|--------------|
| Cu/TiO <sub>2</sub> spherical particles     | impregnation                     | 6 W UV lampe           | methanol/water            | 333.5                                            | 1            |
| Pt/TiO <sub>2</sub> Nanosheets              | hydrothermal                     | 350-W Xe arc lamp      | ethanol/water             | 334                                              | 2            |
| Au/TiO <sub>2</sub>                         | photodeposition                  | 500 W xenon (Xe) lamp  | 2-propanol/water solution | 1320                                             | 3            |
| Ag-TiO <sub>2</sub>                         | sol-gel                          | 6 W UV lampe           | methanol/water            | 356.75                                           | 4            |
| Pt/TiO <sub>2</sub> (B) Nanofiber           | wet impregnation                 | 15 W UV lamp           | Neat ethanol              | 477                                              | 5            |
| Pt/TiO <sub>2</sub> (B) nanofiber           | impregnation                     | 15 W UV lamps          | neat ethanol              | 2380                                             | 6            |
| Au/Pt/TiO <sub>2</sub> composite nanofibers | electrospinning                  | 300 W Xe lamp          | aqueous solution          | 233.16                                           | 7            |
| Au-Pt/TiO <sub>2</sub> nanoparticles        | chemical reduction               | 300 W xenon arc lamp   | water/methanol            | 1183                                             | 8            |
| Ag/TiO <sub>2</sub> mesoporous nanofibers   | foaming-assisted electrospinning | 300 W Xe               | water/methanol            | 537.5                                            | Current work |

### References

1. H. J. Choi and M. Kang, *Int. J. Hydrogen Energy*, 2007, **32**, 3841-3848.
2. J. Yu, L. Qi and M. Jaroniec, *J. Phys. Chem. C*, 2010, **114**, 13118-13125.
3. A. Tanaka, S. Sakaguchi, K. Hashimoto and H. Kominami, *Acs Catalysis*, **2012**, *3*, 79-85.
4. M. S. Park and M. Kang, *Mater. Lett.*, 2008, **62**, 183-187.
5. F. C. Wang, C. H. Liu, C. W. Liu, J. H. Chao and C. H. Lin, *J. Phys. Chem. C*, 2009, **113**, 13832-13840.
6. C. H. Lin, J. H. Chao, C. H. Liu, J. C. Chang and F. C. Wang, *Langmuir*, 2008, **24**, 9907-9915.
7. Z. Zhang, Z. Wang, S. W. Cao and C. Xue, *J. Phys. Chem. C*, 2013, **117**, 25939-25947.
8. F. Wang, Y. Jiang, D. J. Lawes, G. E. Ball, C. Zhou, Z. Liu, and R. Amal, *ACS Catalysis*, 2015, **5**, 3924-3931.
